# Supplementary material for: Isoprene-Degrading Bacteria from Soils Associated with Tropical Economic Crops and Framework Forest Trees
Source: MDPI journal article supplement (doi:10.3390/microorganisms9051024), 2021-05-10
Supplement: s1 [file s1]

# Isoprene-Degrading Bacteria from Soils Associated with Tropical Economic Crops and Framework Forest Trees

Toungporn Uttaratat, Boyd A. McKew, Farid Benyahia, J. Colin Murrell, Wuttichai Mhuantong, Sunanta Wangkarn, Thararat Chitov, Sakunnee Bovonsombut, and Terry J. McGenity

**Table S1.** Soil type and mean values of temperature, moisture and pH, n = 5.

| Plant Species         | Soil type  | Soil temperature (°C) |        |        | Soil moisture (% dry weight) |        |        | pH    |        |        |
|-----------------------|------------|-----------------------|--------|--------|------------------------------|--------|--------|-------|--------|--------|
|                       |            | rainy                 | winter | summer | rainy                        | winter | summer | rainy | winter | summer |
| Council tree          | Clay loam  | 19.0                  | 17.0   | 20.0   | 41.30                        | 39.10  | 36.54  | 5.3   | 5.4    | 5.5    |
| Wild oak              | Clay loam  | 19.0                  | 17.0   | 21.0   | 44.05                        | 38.29  | 37.10  | 5.2   | 5.3    | 5.3    |
| Wild Himalayan cherry | Clay loam  | 19.5                  | 17.5   | 20.0   | 43.18                        | 35.14  | 33.27  | 5.3   | 5.2    | 5.3    |
| Oil palm              | Sandy loam | 23.0                  | 22.0   | 26.0   | 26.20                        | 21.11  | 14.60  | 5.7   | 5.8    | 5.8    |
| Rubber tree           | Sandy loam | 24.0                  | 22.5   | 26.0   | 25.08                        | 20.89  | 13.03  | 5.6   | 5.9    | 5.7    |
| Sugar cane            | Sandy loam | 23.0                  | 22.5   | 25.0   | 22.34                        | 19.52  | 12.95  | 5.8   | 5.7    | 5.8    |

**Table S2.** Identification of isoprene-degrading isolates based on partial 16S rRNA gene sequence analysis

| Source                | Isolate | Accession number | Closest relative                                | % Identity | Accession number |
|-----------------------|---------|------------------|-------------------------------------------------|------------|------------------|
| Wild Himalayan cherry | 17f     | MW509984         | <i>Ochrobactrum oryzae</i> strain NBRC 102588   | 99.32      | NR114151         |
| Wild Himalayan cherry | z29     | MW509985         | <i>Arthrobacter woluwensis</i> strain 1551      | 98.72      | NR044894         |
| Wild Himalayan cherry | 32f     | MW509983         | <i>Bacillus frigoritolerans</i> strain DSM 8801 | 99.72      | NR115064         |
| Wild Himalayan cherry | 39f     | MW509987         | <i>Friedmanniella spumicola</i> strain Ben 107  | 95.77      | NR024907         |
| Wild oak              | z19     | MW509988         | <i>Klebsiella oxytoca</i> strain JCM1665        | 99.57      | NR112010         |
| Sugar cane            | m29     | MW509981         | <i>Bacillus aryabhatai</i> strain B8W22         | 99.86      | NR115953         |
| Sugar cane            | 17      | MW509982         | <i>Isophtericola nanjingensis</i> strain H17    | 99.78      | NR117941         |
| Oil palm              | 23      | MW509986         | <i>Cellulosimicrobium funkei</i> strain W6122   | 99.86      | NR042937         |
